# Supplementary material for: Civic Online Reasoning Among Adults: An Empirical Evaluation of a Prescriptive Theory and Its Correlates
Source: Frontiers journal article supplement (doi:10.3389/feduc.2022.721731), 2022-07-08
Supplement: Data_Sheet_1.docx [file Data_Sheet_1.docx]

Supplementary Material

# Supplementary Figures

Article A

**The government takes a combined approach to "racism" online.**

Published 24 November 2016 at 09.19

National news.

The government wants to punish more immigration critics who commit crimes of opinion online, by prosecuting more people for hate speech against ethnic groups. Now the government is presenting a plan against various "forms of hostility online", reports Sveriges Radio.

Article B
**The government wants to take a combined approach to racism.**
Published Wednesday 23 November 2016 at 16.30

The government today unveiled a national plan against racism, hate crimes and various “forms of hostility” with a focus on countering threats and hatred online. The Minister for Home Affairs Anders Ygeman believes that results will soon be seen. “There will be a change in the way that more people will be able to be brought to justice for hate crimes pretty soon because now we have got these special hate crime units and they will become specialists in their field. Of course, I expect there to be results,” says Anders Ygeman.

**Supplementary Figure 1**. Translation of texts for corroboration article Figure 3.

# Self-rated questions (translated to English)

**Internet info reliability**
How much of the information on the internet do you consider reliable?
Everything – Most of it – Approximately the half – A small part – None – I don’t know

**Fact-checking ability**
How good are you at being source critical to the information on the internet?
Very good – Good – Neither – Less good – Not at all good

**Sourcing at work**Have you worked with critically scrutinizing information?No, never – Yes, but only a little – Yes, a fair amount – Yes, very much

**Credibility importance**
How important is it, for you, that the news you consume are credible?
Not at all important – Very important (1-5)
